# Supplementary material
Source: PubMed Central journal article supplement (PMC5460734)
Supplement: jc.2017-00022.st1.pdf [file jc.2017-00022.st1.pdf]

**Supplemental table 1. Adjusted blood glucose levels according to quartile of trimester-specific urinary BPA ( $\mu\text{g/L}$ ) as well as average BPA concentrations among 168 pregnant women who provided two urine samples in the EARTH study**

| <b>2<sup>nd</sup> Trimester adjusted blood glucose levels<sup>1</sup> (95%CI) in mg/dL from GCT</b>              |                                                             |                                                                                   |                                                             |                                                                                        |                                                                       |
|------------------------------------------------------------------------------------------------------------------|-------------------------------------------------------------|-----------------------------------------------------------------------------------|-------------------------------------------------------------|----------------------------------------------------------------------------------------|-----------------------------------------------------------------------|
| <b>A subset of women who provided urine samples in both 1<sup>st</sup> and 2<sup>nd</sup> trimesters (n=168)</b> |                                                             |                                                                                   |                                                             |                                                                                        |                                                                       |
| <b>Quartile (range) of SG-adjusted 1<sup>st</sup> trimester BPA concentration</b>                                | <b>BPA measured in 1<sup>st</sup> trimester<sup>2</sup></b> | <b>Quartile (range) of SG-adjusted 2<sup>nd</sup> trimester BPA concentration</b> | <b>BPA measured in 2<sup>nd</sup> trimester<sup>2</sup></b> | <b>Quartile (range) of SG-adjusted geometric mean of BPA concentration<sup>4</sup></b> | <b>Average BPA in the 1<sup>st</sup> and 2<sup>nd</sup> trimester</b> |
| Q1 (<LOD, 0.84)                                                                                                  | 119 (111, 128)                                              | Q1 (<LOD, 0.72)                                                                   | 105 (98, 112)                                               | Q1 (0.13, 0.87)                                                                        | 110 (103, 117)                                                        |
| Q2 (0.85, 1.33)                                                                                                  | 114 (106, 122)                                              | Q2 (0.75, 1.12)                                                                   | 116 (108, 123)*                                             | Q2 (0.87, 1.38)                                                                        | 117 (109, 125)                                                        |
| Q3 (1.35, 2.52)                                                                                                  | 117 (109, 126)                                              | Q3 (1.17, 2.25)                                                                   | 114 (107, 122)                                              | Q3 (1.38, 2.18)                                                                        | 111 (104, 118)                                                        |
| Q4 (2.55, 17.0)                                                                                                  | 114 (105, 122)                                              | Q4 (2.25, 31.2)                                                                   | 120 (112, 128)*                                             | Q4 (2.20, 9.67)                                                                        | 116 (109, 124)                                                        |
| P-trend <sup>3</sup>                                                                                             | 0.47                                                        |                                                                                   | 0.009                                                       |                                                                                        | 0.38                                                                  |

Abbreviations: CI, confident intervals; SG-adjusted BPA, specific gravity adjusted BPA concentrations; <LOD, below limit of detection.

<sup>1</sup> Adjusted models controlled for maternal age (years), pre-pregnancy overweight or obese (<25 kg/m<sup>2</sup>,  $\geq$  25 kg/m<sup>2</sup>), total physical activity (hr/week), family history of diabetes, race (white, non-white), infertility diagnosis (male factor, female factor, unexplained) and fetus number in a pregnancy (one fetus, two fetuses).

<sup>2</sup> Additionally adjusted for urine sampling session (morning, afternoon).

<sup>3</sup> Tests for linear trend were performed using the median urinary BPA concentration in each quartile as a continuous variable in the model.

<sup>4</sup> Concentrations below LOD were assigned a value equal to the LOD divided by square root of 2 to calculate the geometric means of urinary BPA.

\*P-value for comparison against Q1 < 0.05
